# Supplementary material for: Higher serum vitamin A is associated with a worsened progression of non-alcoholic fatty liver disease in adults: a prospective study
Source: Royal Society of Chemistry journal article supplement (doi:10.1039/d1fo03119h), 2022-01-01
Supplement: d1fo03119h1.pdf [file d1fo03119h1.pdf]

**Supplemental Table 1. Comparison of covariate-adjusted mean of serum vitamin A by groups of severity of NAFLD in first examination.**

| Concentration of serum vitamin A ( $\mu\text{mol/L}$ ) | Absent      | Mild           | Moderate       | Severe      | %diff <sup>1</sup> | p-diff | p-trend |
|--------------------------------------------------------|-------------|----------------|----------------|-------------|--------------------|--------|---------|
| Total (n=2658)                                         |             |                |                |             |                    |        |         |
| Case, n (%)                                            | 1296        | 1073           | 237            | 52          |                    |        |         |
| Model 1 <sup>2</sup>                                   | 1.591±0.012 | 1.673±0.013*** | 1.717±0.026*** | 1.735±0.057 | 9.05               | <0.001 | 0.008   |
| Model 2 <sup>3</sup>                                   | 1.590±0.012 | 1.674±0.013*** | 1.720±0.027*** | 1.737±0.058 | 9.37               | <0.001 | 0.006   |
| Women (n=1819)                                         |             |                |                |             |                    |        |         |
| Case, n (%)                                            | 908         | 710            | 162            | 39          |                    |        |         |
| Model 1 <sup>2</sup>                                   | 1.546±0.014 | 1.643±0.015*** | 1.657±0.032**  | 1.689±0.065 | 9.25               | <0.001 | 0.030   |
| Model 2 <sup>3</sup>                                   | 1.545±0.014 | 1.644±0.015*** | 1.660±0.032**  | 1.695±0.066 | 9.84               | <0.001 | 0.023   |
| Men (n=839)                                            |             |                |                |             |                    |        |         |
| Case, n (%)                                            | 388         | 363            | 75             | 13          |                    |        |         |
| Model 1 <sup>2</sup>                                   | 1.698±0.022 | 1.734±0.022    | 1.834±0.049    | 1.856±0.117 | 9.31               | 0.049  | 0.112   |
| Model 2 <sup>3</sup>                                   | 1.696±0.022 | 1.735±0.022    | 1.835±0.049    | 1.847±0.118 | 8.9                | 0.048  | 0.130   |

<sup>1</sup>%Diff: percentage difference = (improved-progressed)/progressed × 100%;

<sup>2</sup>Model 1: ANCOVA covariables included age and gender;

<sup>3</sup>Model 2: adjust for variables in model 1 plus household income, physical activity, smoking, tea drinking, alcohol drinking and energy intake; polynomial contrasts method = Bonferroni; \*\* p<0.01, \*\*\* p<0.01, compared with absent;

**Supplemental Table 2. Comparison of covariate-adjusted mean of serum vitamin A by groups of progress, stable and improve.**

| Concentration of serum vitamin A ( $\mu\text{mol/L}$ ) | Progressed | Stable      | Improved     | %diff <sup>1</sup> | p-diff | p-trend |
|--------------------------------------------------------|------------|-------------|--------------|--------------------|--------|---------|
| Total (n=2658)                                         |            |             |              |                    |        |         |
| Case, n(%)                                             | 459 (17.3) | 1645 (61.9) | 554 (20.8)   |                    |        |         |
| Model 1 <sup>2</sup>                                   | 1.68±0.02  | 1.65±0.01   | 1.57±0.02*** | -6.50              | 0.002  | 0.001   |
| Model 2 <sup>3</sup>                                   | 1.69±0.02  | 1.65±0.01   | 1.56±0.02*** | -7.70              | 0.001  | <0.001  |
| Women (n=1819)                                         |            |             |              |                    |        |         |
| Case, n(%)                                             | 349 (19.2) | 1092 (60.0) | 378 (20.8)   |                    |        |         |
| Model 1                                                | 1.63±0.02  | 1.61±0.01   | 1.53±0.03*'  | -6.10              | 0.019  | 0.010   |
| Model 2                                                | 1.64±0.02  | 1.61±0.01   | 1.52±0.03*'  | -7.30              | 0.011  | 0.005   |
| Men (n=839)                                            |            |             |              |                    |        |         |
| Case, n(%)                                             | 110 (13.1) | 553 (65.9)  | 176 (21.0)   |                    |        |         |
| Model 1                                                | 1.80±0.04  | 1.74±0.02   | 1.66±0.04    | -7.80              | 0.062  | 0.019   |
| Model 2                                                | 1.80±0.05  | 1.74±0.02   | 1.66±0.04    | -7.80              | 0.076  | 0.024   |

<sup>1</sup>%Diff: percentage difference = (improved-progressed)/progressed × 100%;

<sup>2</sup>Model 1: ANCOVA covariables included age, gender and the degree of NAFLD in 1st follow up;

<sup>3</sup>Model 2: adjust for variables in model 1 plus household income, physical activity, smoking, tea drinking, alcohol drinking and energy intake; polynomial contrasts method = Bonferroni. \* p<0.05, compared with stable; \*\* p<0.01, compared with stable; ' p<0.05, compared with progressed; " p<0.01, compared with progressed;

**Supplemental Table 3. The results of the path coefficients**

Regression weights of trimmed model

|                                                           |      |                 | Estimate       |              | SE    | C.R.   | p-value | GFI   | AGFI  |
|-----------------------------------------------------------|------|-----------------|----------------|--------------|-------|--------|---------|-------|-------|
|                                                           |      |                 | Unstandardized | Standardized |       |        |         |       |       |
| <b>Degree of NAFLD in first examination</b>               |      |                 |                |              |       |        |         | 0.975 | 0.893 |
| Serum RBP4                                                | <--- | serum vitamin A | 0.133          | 0.304        | 0.008 | 16.552 | ***     |       |       |
| HOMA-IR                                                   | <--- | serum vitamin A | 0.229          | 0.065        | 0.068 | 3.393  | ***     |       |       |
| BMI                                                       | <--- | serum vitamin A | 0.489          | 0.066        | 0.143 | 3.409  | ***     |       |       |
| Serum TG                                                  | <--- | serum vitamin A | 0.565          | 0.198        | 0.054 | 10.459 | ***     |       |       |
| Degree of NAFLD                                           | <--- | Serum RBP4      | 0.172          | 0.045        | 0.065 | 2.661  | 0.008   |       |       |
| Degree of NAFLD                                           | <--- | HOMA-IR         | 0.105          | 0.220        | 0.009 | 12.309 | ***     |       |       |
| Degree of NAFLD                                           | <--- | BMI             | 0.087          | 0.384        | 0.004 | 21.527 | ***     |       |       |
| Degree of NAFLD                                           | <--- | Serum TG        | 0.061          | 0.104        | 0.010 | 6.159  | ***     |       |       |
| <b>Change of degree of NAFLD between two examinations</b> |      |                 |                |              |       |        |         | 0.976 | 0.897 |
| Serum RBP4                                                | <--- | serum vitamin A | 0.133          | 0.304        | 0.008 | 16.552 | ***     |       |       |
| HOMA-IR                                                   | <--- | serum vitamin A | 0.229          | 0.065        | 0.068 | 3.393  | ***     |       |       |
| BMI                                                       | <--- | serum vitamin A | 0.489          | 0.066        | 0.143 | 3.409  | ***     |       |       |
| Serum TG                                                  | <--- | serum vitamin A | 0.565          | 0.198        | 0.054 | 10.459 | ***     |       |       |
| Change of NAFLD                                           | <--- | Serum RBP4      | 0.237          | 0.087        | 0.053 | 4.521  | ***     |       |       |
| Change of NAFLD                                           | <--- | HOMA-IR         | 0.023          | 0.066        | 0.007 | 3.273  | 0.001   |       |       |
| Change of NAFLD                                           | <--- | BMI             | 0.028          | 0.173        | 0.003 | 8.530  | ***     |       |       |
| Change of NAFLD                                           | <--- | Serum TG        | 0.049          | 0.116        | 0.008 | 6.031  | ***     |       |       |

Abbreviation: GFI, Goodness of Fit Index. AGFI, Adjusted Goodness of Fit Index; NAFLD, non-alcoholic fatty liver disease; RBP4, retinol binding protein 4; HOMA-IR, HOMA insulin resistance index; BMI, body mass index; TG, triglycerides; \*\*\* p<0.001

**Supplemental Table 4. Estimated means and standard error of serum vitamin A in multiple-adjusted model and further adjustments.**

| Model                                       | Multivariable adjusted mean (SEM) and the standard error (SE) of the serum vitamin A |                      |                      |         |
|---------------------------------------------|--------------------------------------------------------------------------------------|----------------------|----------------------|---------|
|                                             | Progressed                                                                           | Stable               | Improved             | P-trend |
| Multiple adjusted model*                    | 1.683 (1.642, 1.723)                                                                 | 1.651 (1.630, 1.671) | 1.565 (1.521, 1.608) | <0.001  |
| Further adjusted for intakes of animal fats | 1.689 (1.647, 1.731)                                                                 | 1.650 (1.629, 1.671) | 1.560 (1.515, 1.604) | <0.001  |
| Further adjusted for intakes of cholesterol | 1.688 (1.646, 1.731)                                                                 | 1.650 (1.629, 1.671) | 1.560 (1.516, 1.605) | <0.001  |
| Further adjusted for change of BMI          | 1.685 (1.644, 1.726)                                                                 | 1.650 (1.630, 1.671) | 1.564 (1.521, 1.607) | <0.001  |
| Further adjusted for change of weight       | 1.692 (1.649, 1.734)                                                                 | 1.646 (1.625, 1.668) | 1.558 (1.514, 1.602) | <0.001  |

\*: ANCOVA model adjusted for age, sex, energy intake, physical activity, household income, smoking, tea drinking, and alcohol drinking.
